# Supplementary material for: Three-dimensional conductive networks based on stacked SiO2@graphene frameworks for enhanced gas sensing
Source: Royal Society of Chemistry journal article supplement (doi:10.1039/c6nr06465e), 2016-10-03
Supplement: c6nr06465e1.pdf [file c6nr06465e1.pdf]

## Supporting Information

### Three-Dimensional Conductive Networks based on Stacked SiO<sub>2</sub>@graphene Frameworks for Enhanced Gas Sensing

Da Huang,<sup>a</sup> Zhi Yang,<sup>\*a,b</sup> Xiaolin Li,<sup>a</sup> Liling Zhang,<sup>a</sup> Jing Hu,<sup>a</sup> Yanjie Su,<sup>a</sup> Nantao Hu,<sup>\*a</sup> Guilin Yin,<sup>b</sup> Dannong He<sup>b</sup> and Yafei Zhang<sup>a</sup>

<sup>a</sup>Key Laboratory for Thin Film and Microfabrication of Ministry of Education, Department of Micro/Nano Electronics, School of Electronic Information and Electrical Engineering, Shanghai Jiao Tong University, Shanghai 200240, P. R. China.

Email: zhiyang@sjtu.edu.cn and hunantao@sjtu.edu.cn

<sup>b</sup>National Engineering Research Center for Nanotechnology, Shanghai 200241, P. R. China

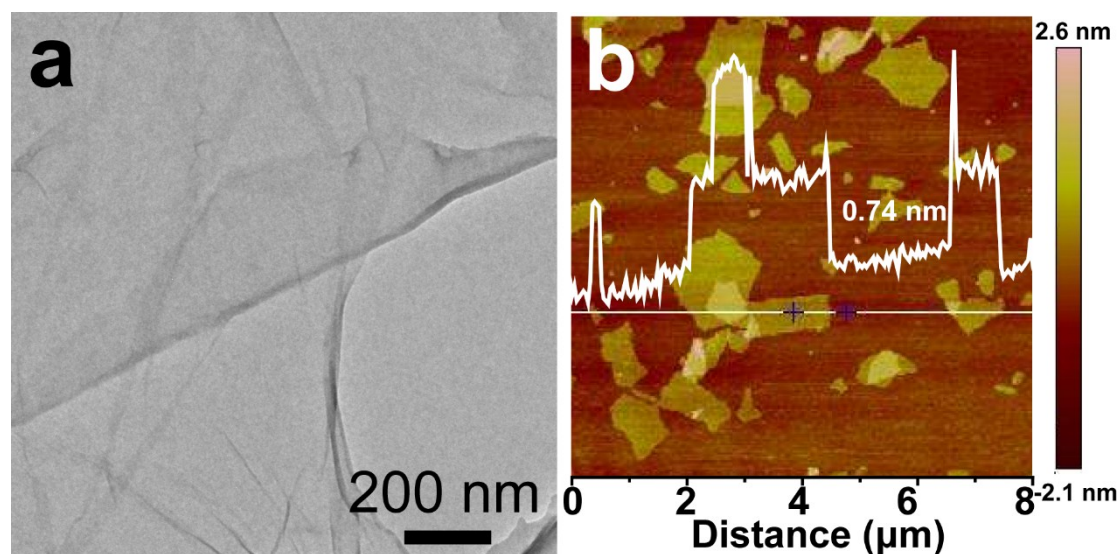

**Fig. S1** (a) TEM images of bare GO. (b) Representative AFM image and corresponding thickness analysis, revealing a uniform thickness of 0.74 nm for bare GO nanosheets.

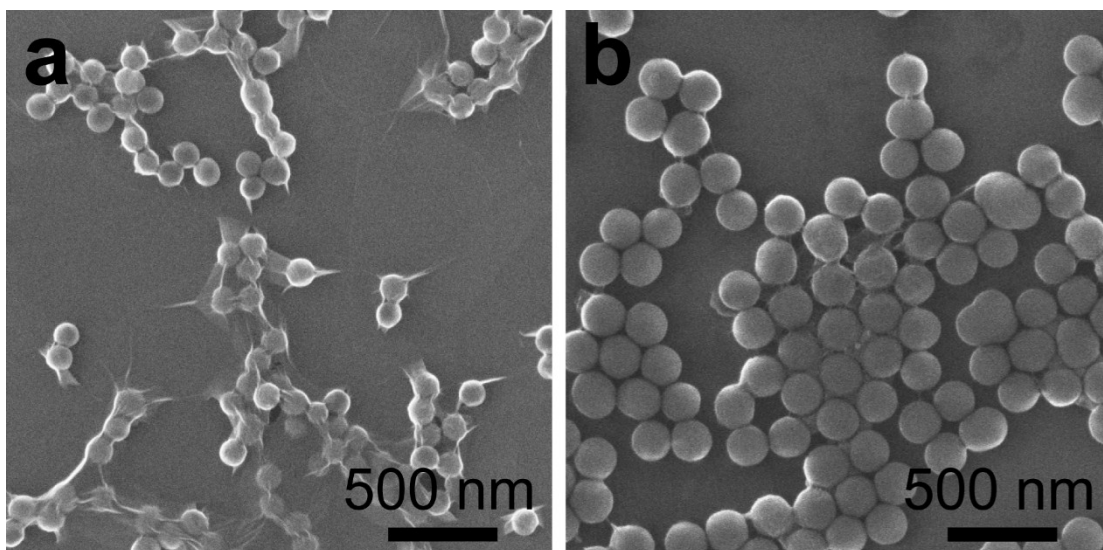

**Fig. S2** SEM images of (a) SiO<sub>2</sub>@GO composites made from 130 nm SiO<sub>2</sub> spheres. (b) SiO<sub>2</sub>/GO mixture, without modification of SiO<sub>2</sub> spheres by APTMS.

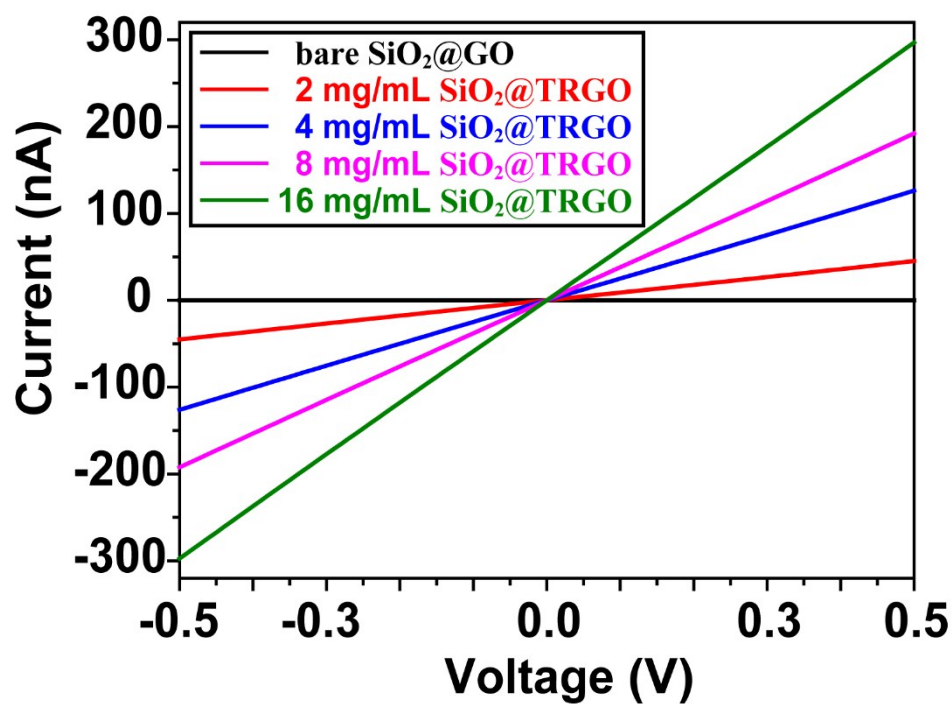

**Fig. S3** *IV* curves of bare SiO<sub>2</sub>@GO and SiO<sub>2</sub>@TRGO with different concentration.

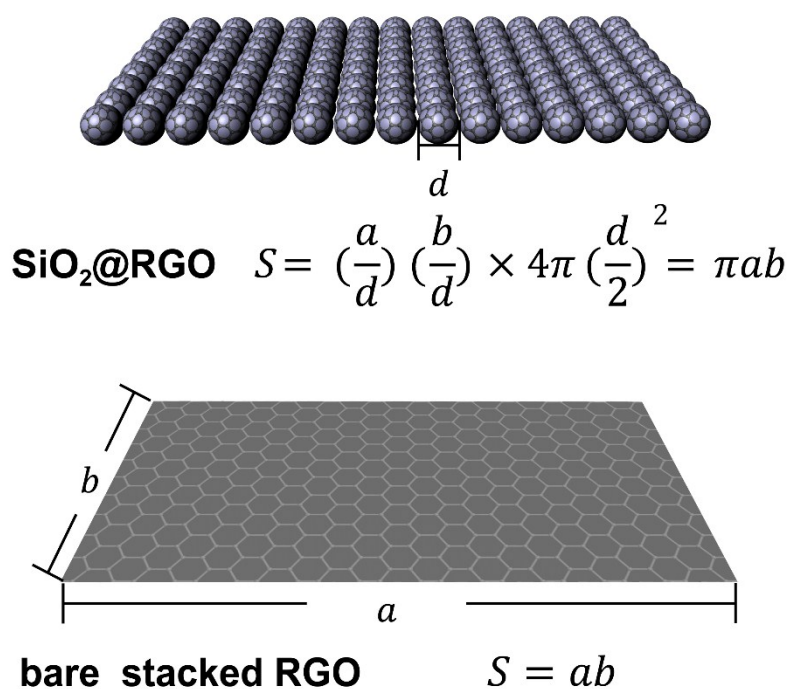

**Fig. S4** Schematic illustration of the increased surface area brought by 3D SiO<sub>2</sub>@RGO framework.

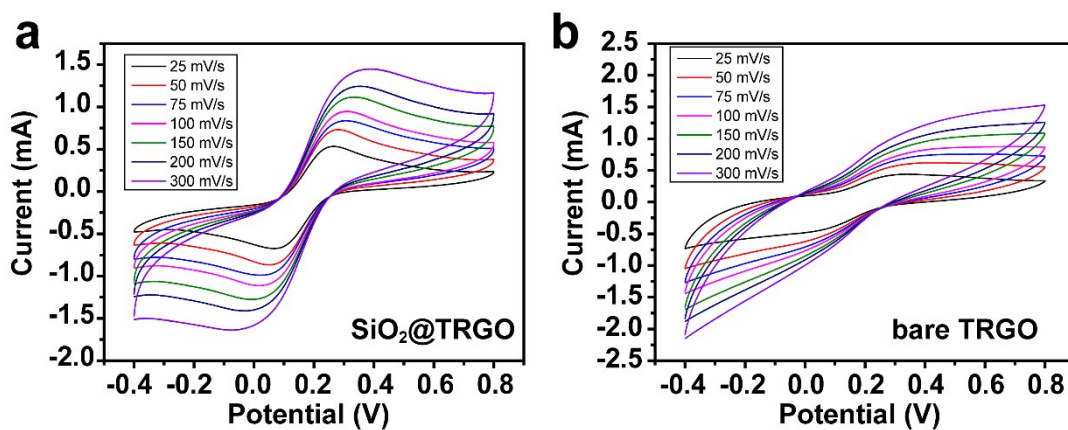

**Fig. S5** Cyclic voltammograms of (a) SiO<sub>2</sub>@TRGO and (b) TRGO in a 10 mM [Fe(CN)<sub>6</sub>]<sup>3-/4-</sup> and 0.1 M KCl solution at different scan rates from 25 to 300 mV s<sup>-1</sup>.

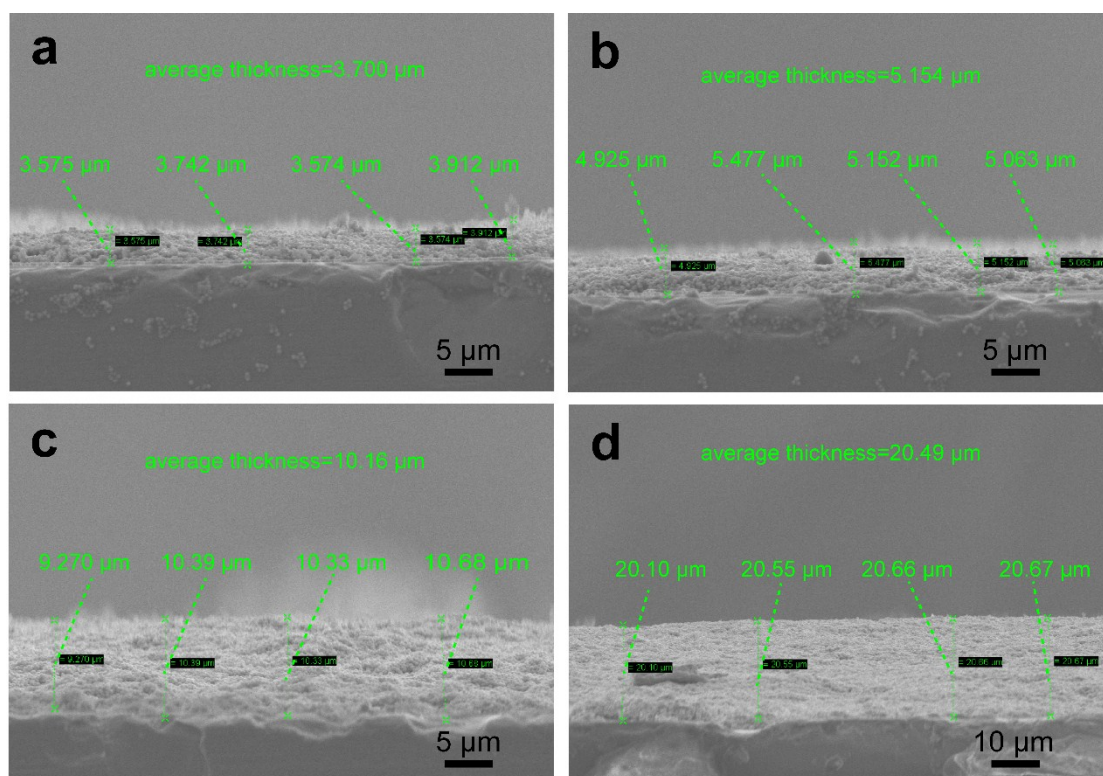

**Fig. S6** The thickness of SiO<sub>2</sub>@TRGO film on interdigital electrodes with different concentrations of (a) 2 mg/mL, (b) 4 mg/mL, (c) 8 mg/mL and (d) 16 mg/mL.

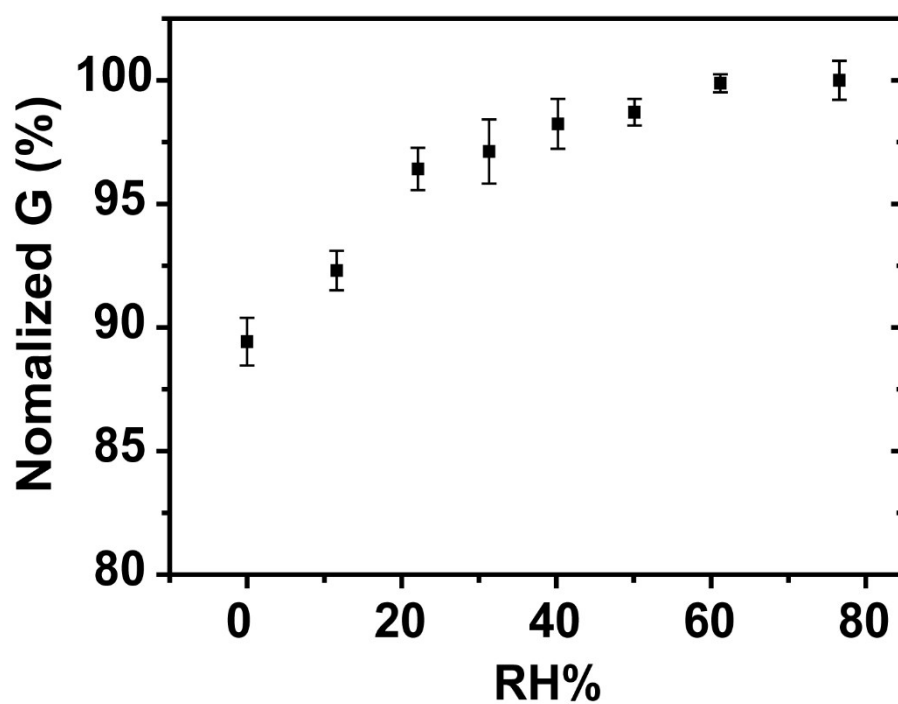

**Fig. S7** The change of conductivity of SiO<sub>2</sub>@TRGO sensors in different RH.



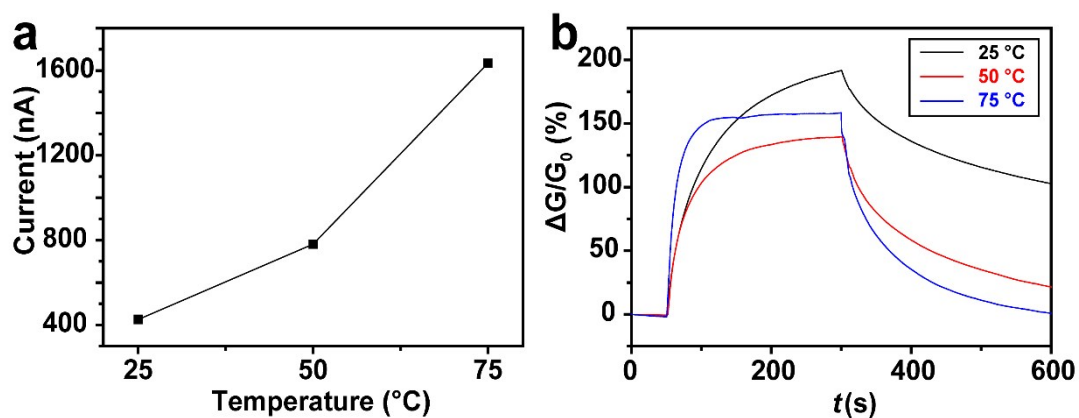

**Fig. S8** (a) The change of conductivity of SiO<sub>2</sub>@TRGO sensors at different temperature, (b) The response curves of SiO<sub>2</sub>@TRGO towards 50 ppm NO<sub>2</sub> at different temperatures.

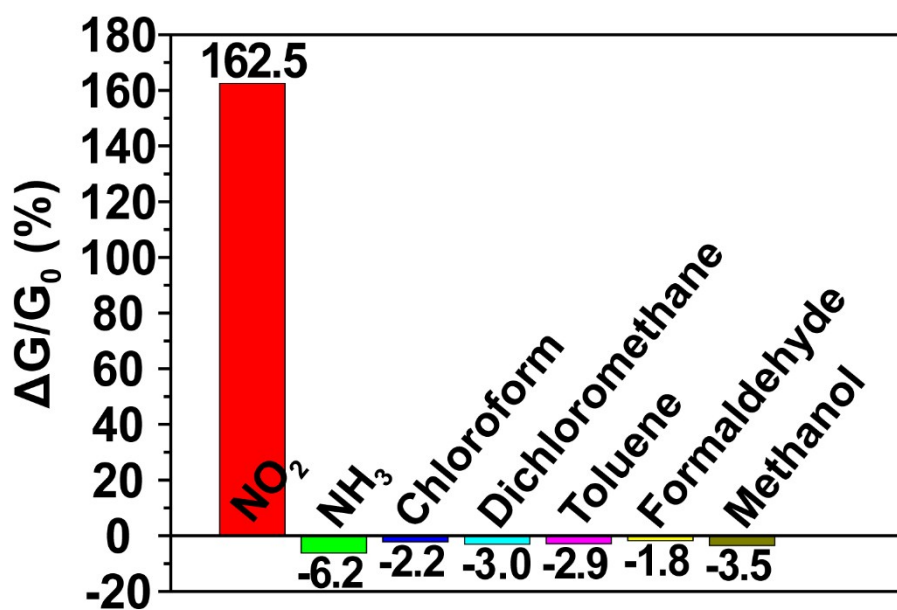

**Fig. S9** Selectivity of SiO<sub>2</sub>@TRGO based sensing device towards 50 ppm NO<sub>2</sub>, 50 ppm NH<sub>3</sub> compared with other analytes with 1% of saturated vapor concentrations.

**Table S1.** Comparison of sensing performance of some graphene based sensing devices reported previously.

| Sensing material             | Dimen-<br>sional | Modified<br>graphene | Increased<br>surface | Response towards NH <sub>3</sub> ( $\Delta G/R_0$ ) | Response towards NO <sub>2</sub> ( $\Delta G/G_0$ ) | Ref |
|------------------------------|------------------|----------------------|----------------------|-----------------------------------------------------|-----------------------------------------------------|-----|
| SiO <sub>2</sub> @TRGO       | 3D               | -                    | Yes                  | 6.8% for 50 ppm NH <sub>3</sub> in 250 s            | 35.5% for 1 ppm NO <sub>2</sub> in 250 s            | -   |
| Bare TRGO                    | 2D               | -                    | -                    | 27% for 1% NH <sub>3</sub> in 50 min                | 12% for 2 ppm NO <sub>2</sub> in 40 min             | 1   |
| Chemical reduced GO          | 2D               | Yes                  | -                    | 5.5%for 200 ppm NH <sub>3</sub> in 500s             | -                                                   | 2   |
| Chemical reduced GO          | 2D               | Yes                  | -                    | -                                                   | 88% for 5 ppm NO <sub>2</sub> in 10 min             | 3   |
| CVD graphene foam            | 3D               | -                    | Yes                  | 30% for 1% NH <sub>3</sub> in 800 s                 | ~4% for 20 ppm NO <sub>2</sub> in 400 s             | 4   |
| RGO/Ag nanowires             | -                | Yes                  | -                    | 7.5% for 50 ppm NH <sub>3</sub> in 300s             | -                                                   | 5   |
| Vertically oriented graphene | 3D               | -                    | Yes                  | 5% for 1% NH <sub>3</sub> in 18 min                 | 157% for 200 ppm NO <sub>2</sub> in 14 min          | 6   |
| Graphene nanomesh            | -                | Yes                  | Yes                  | 11.8% for 50 ppm NH <sub>3</sub> in 20 min          | 6% for 1 ppm NO <sub>2</sub> in 15 min              | 7   |
| RGO on 3D pillars            | 3D               | -                    | Yes                  | 100% for 40 ppm NH <sub>3</sub> in 2000 s           | 28% for 5 ppm NO <sub>2</sub> in 15 min             | 8   |

## Notes and references

1. G. H. Lu, L. E. Ocola and J. H. Chen, *Nanotechnology*, 2009, **20**, 445502.
2. R. Ghosh, A. Midya, S. Santra, S. K. Ray and P. K. Guha, *ACS Appl. Mater. Interfaces*, 2013, **5**, 7599–7603.
3. W. J. Yuan, A. R. Liu, L. Huang, C. Li and G. Q. Shi, *Adv. Mater.*, 2013, **25**, 766–771.
4. F. Yavari, Z. P. Chen, A. V. Thomas, W. C. Ren, H.-M. Cheng and N. Koratkar, *Sci. Rep.*, 2011, **1**, 166.
5. T. Quang Trung, H. Huynh Tran My, D.-H. Yoo, C. Tran Viet, S. H. Hur, J. S. Chung, E. J. Kim and P. A. Kohl, *Sens. Actuators, B*, 2014, **194**, 45–50.
6. K. Yu, P. Wang, G. Lu, K.-H. Chen, Z. Bo and J. Chen, *J. Phys. Chem. Lett.*, 2011, **2**, 537–542.
7. R. K. Paul, S. Badhulika, N. M. Saucedo and A. Mulchandani, *Anal. Chem.*, 2012, **84**, 8171–8178.
8. D. Le Thai, D.-J. Kim, T. Tran Quang, D. Vinh Quang, B.-Y. Kim, H. K. Moon and N.-E. Lee, *Adv. Funct. Mater.*, 2015, **25**, 883–890.
